# Supplementary material
Source: publisher figshare collection journal article supplement (https://tandf.figshare.com/ndownloader/files/16636382)
Supplement: Supplementary file 1 [file 16636382]

**Cisplatin Functionalized Three-Dimensional Magnetic SBA-16 for Treating Breast Cancer Cells (MCF-7)**

**Munther Alomaria, Rabindran Jermy Balasamyb*, Vijaya Ravinayagam**c***, S. Akhtard, Sarah Ameen Almoftya, Suriya Rehman***e*, **Hiba Bahmdana**, **Sayed** **AbdulAzeez**f **and J.** **Francis Borgio**f

*aDepartment of Stem Cell Research, Institute for Research and Medical Consultations, Imam Abdulrahman Bin Faisal University,* P. O. Box. 1982, Dammam 31441, Saudi Arabia*.*

b*Department of Nano-Medicine Research, Institute for Research and Medical Consultations, Imam Abdulrahman Bin Faisal University,* P. O. Box. 1982, Dammam 31441, Saudi Arabia*.*

*cDeanship of Scientific Research & Department of Nano-Medicine Research, Imam Abdulrahman Bin Faisal University,* P. O. Box. 1982, Dammam 31441, Saudi Arabia*.*

*dDepartment of Biophysics Research, Institute for Research and Medical Consultations, Imam Abdulrahman Bin Faisal University,* P. O. Box. 1982, Dammam 31441, Saudi Arabia*.*

*eDepartment of Epidemic Disease Research, Institute for Research and Medical Consultations, Imam Abdulrahman Bin Faisal University,* P. O. Box. 1982, Dammam 31441, Saudi Arabia*.*

*fDepartment of Genetic Research, Institute for Research and Medical Consultations, Imam Abdulrahman Bin Faisal University,* P. O. Box. 1982, Dammam 31441, Saudi Arabia*.*

**Corresponding author*

B. Rabindran Jermy and Vijaya Ravinayagam

e-mail: rjermy@iau.edu.sa (B.R. Jermy); vrnayagam@iau.edu.sa (V. Ravinayagam); Tel: +966 3330881

Fig. S1. TEM analysis of Fe/S-16.

Fig. S2


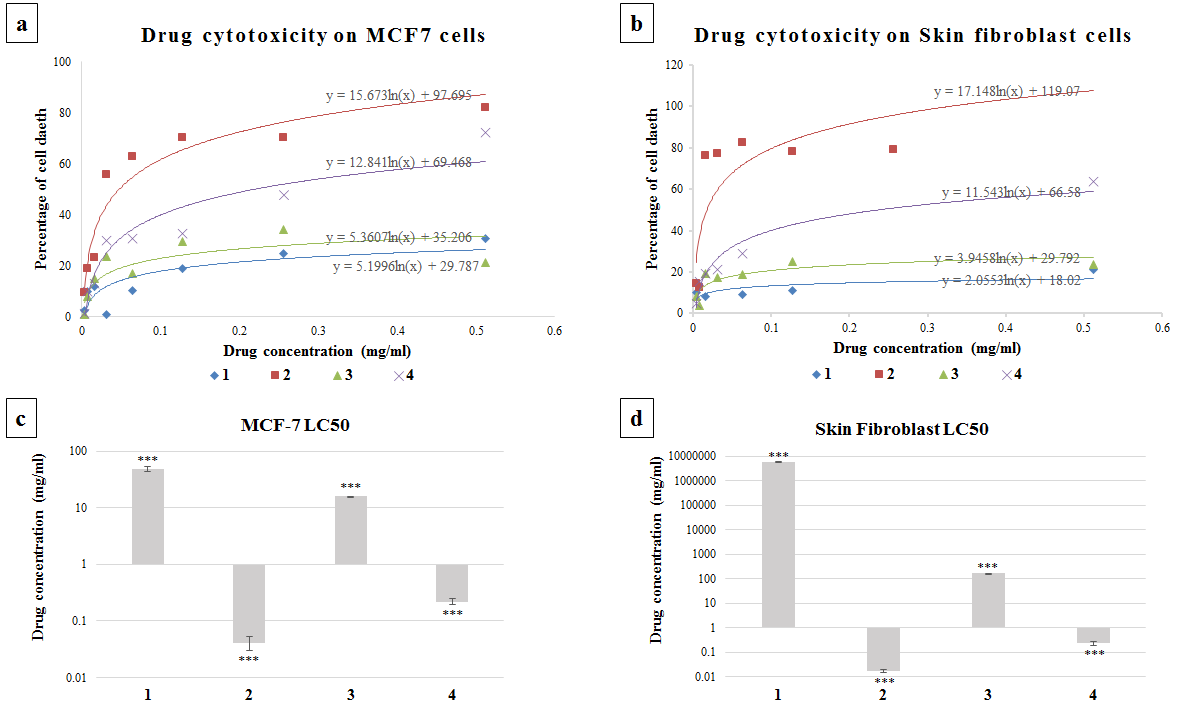


**Figure S2.** Cytotoxicity analysis of Fe/S-16 (1), Cisplatin (2), Fe/S-16-AP-Cp (3) and Fe/S-16-A-Cp (4) on normal and cancer cell lines. (a), breast cancer cell line MCF-7, (b), normal cell lines HFF-1. These graphs were plotted to obtain LC50 values for each of the drugs tested on the cell lines (refer to Table 1). Different concentrations of each nanoformulated drug and control were applied on each cell line then the cytotoxicity was measured by MTT assay, the resulted data was blotted in excel and calculated the LC50 using the equation of the logarithmic trendline. The p value and standard deviation were measured by one-way anova in GraphPad prism software. Blotting the LC50 of effective nanoparticles against the two cell lines (c), MCF-7 and (d), HFF-1, (***p<.001, n=3).
